# Supplementary material for: Risk factors for the carriage of Streptococcus infantarius subspecies infantarius isolated from African fermented dairy products
Source: PLoS One. 2019 Nov 27;14(11):e0225452. doi: 10.1371/journal.pone.0225452 (PMC6881063; doi:10.1371/journal.pone.0225452)
Supplement: S2 Table — Study participants featuring isolate pairs from fecal and dairy samples with participant’s dietary habits and corresponding isolate information on sequence type (ST) and dairy adaption marker genes lacS/lacZ. (XLSX) [file pone.0225452.s003.xlsx]

## Sheet: Feuil1
S2 Table: Key characteristics of the study participants featuring isolate pairs from fecal and dairy samples. Study participants featuring isolate pairs from fecal and dairy samples with participant’s dietary habits and corresponding isolate information on sequence type (ST) and dairy adaption marker genes lacS/lacZ.
Participant ID	Sample ID	Source	Isolate ID	Species	ST	lacS/ lacZ	Dairy consumption patterns of participant				Boiling prior to consumption		Pair type	Participant is double carrier of different Sii STs	Participant carries multiple SBSEC species
							tFDP
							informal FDP	homemade FDP	industrial FDP	Raw-milk-general	informal FDP	homemade FDP
AR004	AR004A	fermented milk	AR004A26.1	Sii	143	neg	-	-	-	-	-	no answer	human-dairy	n.d.
	AR004A	fermented milk	AR004A26.3	Sii	138	pos
	AR004F	human feces	AR004F6.1	Sii	152	neg
AR007	AR007A	fermented milk	AR007A22.1	Sii	138	pos	-	-	-	-	-	-	dairy-raw+ferm	n.d.
	AR007B	raw milk	AR007B22.1	Sii	139	pos
AR016	AR016A	fermented milk	AR016A23.2	Sii	140	neg	-	-	-	yes	-	no answer	dairy-raw+ferm	n.d.
	AR016B	raw milk	AR016B16.2	Sii	141	pos
AR017	AR017F	human feces	AR017F6.1	Sii	115	pos	-	-	-	-	-	no answer	human-human	yes
	AR017F	human feces	AR017F6.2	Sii	116	neg
AR022	AR022A	fermented milk	AR022A21.1	Sii	179	pos	no	yes	no	yes	no	no	human-dairy	n.d.
	AR022F	human feces	AR022F12.1	Sii	172	neg
AR036	AR036F	human feces	AR036F1.2.1	Sii	117	neg	no	yes	no	yes	no	no	human-human	yes
	AR036F	human feces	AR036F1.3.1	Sii	118	pos
AR037	AR037A	fermented milk	AR037A21.1	Sii	138	pos	yes	yes	no	yes	no answer	no	human-dairy	n.d.	yes
	AR037F	human feces	AR037F1.1	Sii	119	pos
	AR037F	human feces	AR037F12.1	Sgp	153	neg
AR038	AR038A	fermented milk	AR038A26.2	Sii	86	neg	yes	no	no	yes	no answer	no answer	human-dairy	n.d.
	AR038B	raw milk	AR038B17.1	Sii	143	neg
	AR038F	human feces	AR038F6.2	Sii	154	neg
AR064	AR064A	fermented milk	AR064A16.2	Sii	131	neg	no	no	no	no	no		dairy-raw+ferm	n.d.
	AR064B	raw milk	AR064B17.1	Sii	146	pos
CL026	CL026F	human feces	CL026F1.2.1	Sii	121	neg	no	no	no	no	no answer	no answer	human-human	yes
	CL026F	human feces	CL026F7.2	Sii	122	pos
CL034	CL034F	human feces	CL034F1.1	Sii	173	neg	no	yes	no	no	no answer	yes	human-human	yes
	CL034F	human feces	CL034F11.2.1	Sii	174	neg
CL080	CL080F	human feces	CL080F1.1	Sii	165	pos	yes	no	yes	no	no answer	no answer	human-human	yes
	CL080F	human feces	CL080F11.1.1	Sii	164	pos
FN002	FN002A	fermented milk	FN002A21.3	Sii	150	pos	no	no	no	no	no answer	no answer	human-dairy	yes
	FN002F	human feces	FN002F11.1	Sii	124	neg
	FN002F	human feces	FN002F11.2	Sii	125	pos
GKDT016	GKDT016F	human feces	GKDT016F11.1	Sii	127	neg	no	yes	no	no	no answer	yes	human-human	yes
	GKDT016F	human feces	GKDT016F6.1	Sii	126	pos
TKF022	TKF022F	human feces	TKF022F6.2.1	Sii	132	neg	no	yes	no	no	no answer	no	human-human	yes
	TKF022F	human feces	TKF022F6.2.2	Sii	133	pos
TKF029	TKF029F	human feces	TKF029F11.1.1	Sii	167	neg	no	yes	no	no	no answer	no answer	human-human	yes
	TKF029F	human feces	TKF029F12.1.1	Sii	137	pos
YYS045	YYS045F	human feces	YYS045F1.1	Sii	177	neg	yes	yes	yes	yes	yes	no	human-human	no
	YYS045F	human feces	YYS045F1.2	Sii	177	neg
YYS073	YYS073F	human feces	YYS073F11.3	Sgg	170	neg	no	yes	no	no	no answer	no answer	human-human	n.d.	yes
	YYS073F	human feces	YYS073F12.1.2	S. lutetiensis	171	neg
ST: Sequence type in SBSEC MLST scheme.
n.d. = not determined
Sgg = S. gallolyticus subsp. gallolyticus
Sgp = S. gallolyticus subsp. pasteurianus
Sii = S. infantarius subsp. infantarius
